# Supplementary material for: Protocerebral Bridge Neurons That Regulate Sleep in Drosophila melanogaster
Source: PubMed Central journal article supplement (PMC8554056; doi:10.3389/fnins.2021.647117), 2021-10-15
Supplement: Data_Sheet_1.pdf [file Data_Sheet_1.pdf]

## Supplementary Material

### 1 Supplementary Figures

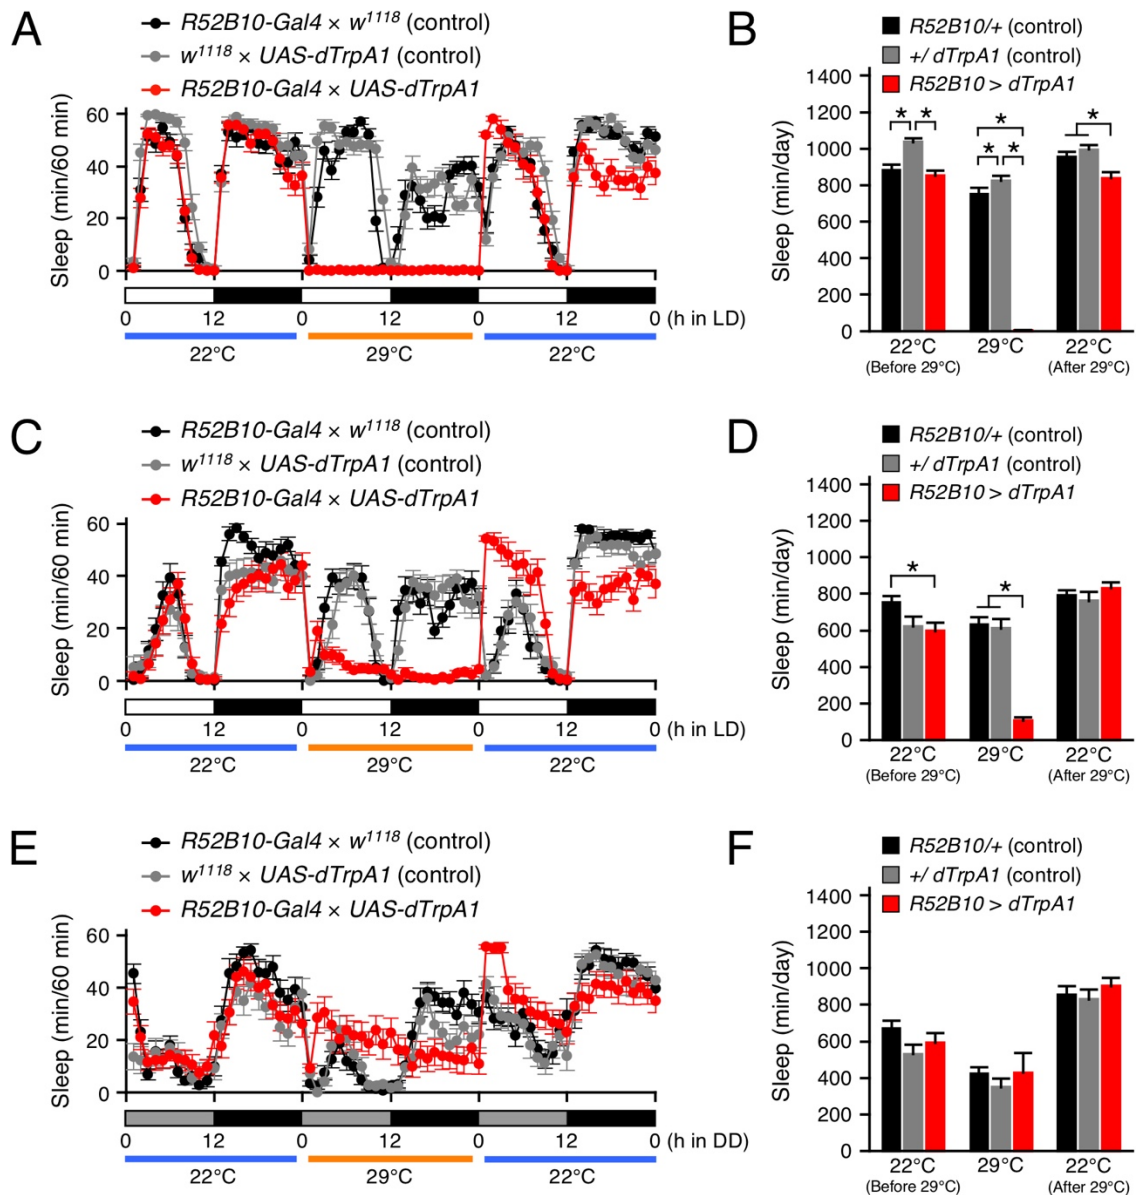

**Supplementary Figure 1.** Activation of *R52B10-Gal4*-expressing neurons in male and female flies under LD conditions decreased the amount of sleep. (**A,B**) Sleep profiles for 60-min intervals (**A**) or total daily sleep (**B**) for control male flies (*R52B10-Gal4* × *w<sup>1118</sup>*, black circles or bars; *w<sup>1118</sup>* × *UAS-dTrpA1*, gray circles or bars) or experimental male flies (*R52B10-Gal4* × *UAS-dTrpA1*, red circles or bars) in LD conditions. (**C-F**) Sleep profiles for 60-min intervals (**C,E**) or total daily sleep (**D,F**) for controls or experimental female flies in LD (**C,D**) and DD (**E,F**) conditions. Data are presented as

mean  $\pm$  SEM ( $n = 15-16$  flies per group).  $*p < 0.05$ ; two-way repeated measures ANOVA followed by Holm multiple comparison test.

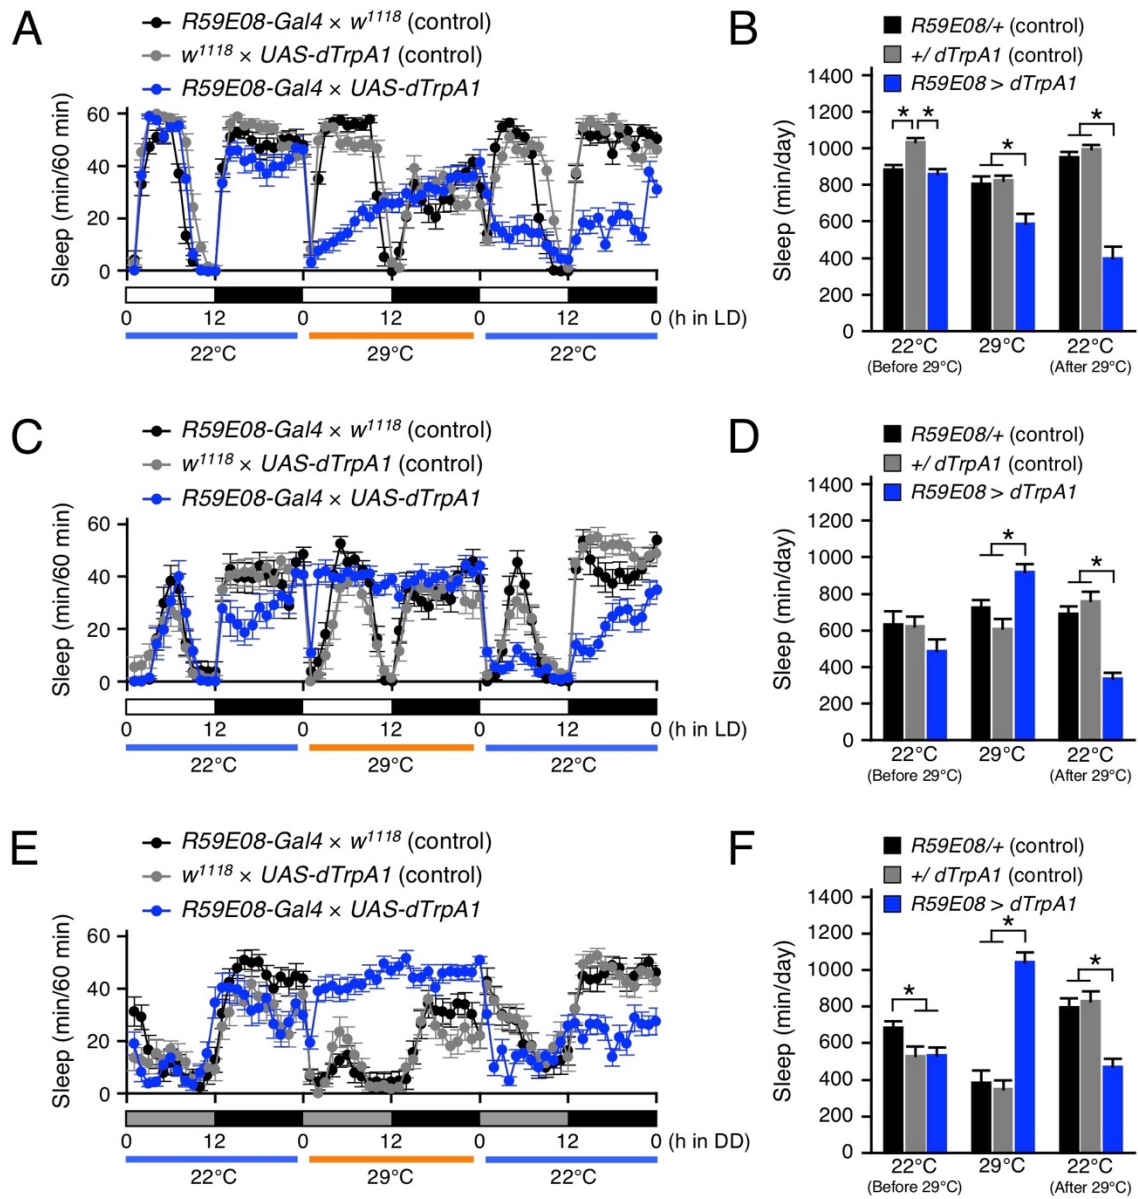

**Supplementary Figure 2.** Activation of *R59E08-Gal4*-expressing neurons in female flies in LD and DD conditions increased the amount of sleep. **(A,B)** Sleep profiles for 60-min intervals **(A)** or total daily sleep **(B)** for control male flies (*R59E08-Gal4* × *w<sup>1118</sup>*, black circles or bars; *w<sup>1118</sup>* × *UAS-dTrpA1*, gray circles or bars) or experimental male flies (*R59E08-Gal4* × *UAS-dTrpA1*, blue circles or bars) in LD conditions. **(C-F)** Sleep profiles for 60-min intervals **(C,E)** or total daily sleep **(D,F)** for controls or experimental female flies in LD **(C,D)** and DD **(E,F)** conditions. Data are presented as mean ± SEM ( $n = 15-16$  flies per group). \* $p < 0.05$ ; two-way repeated measures ANOVA followed by Holm multiple comparison test.

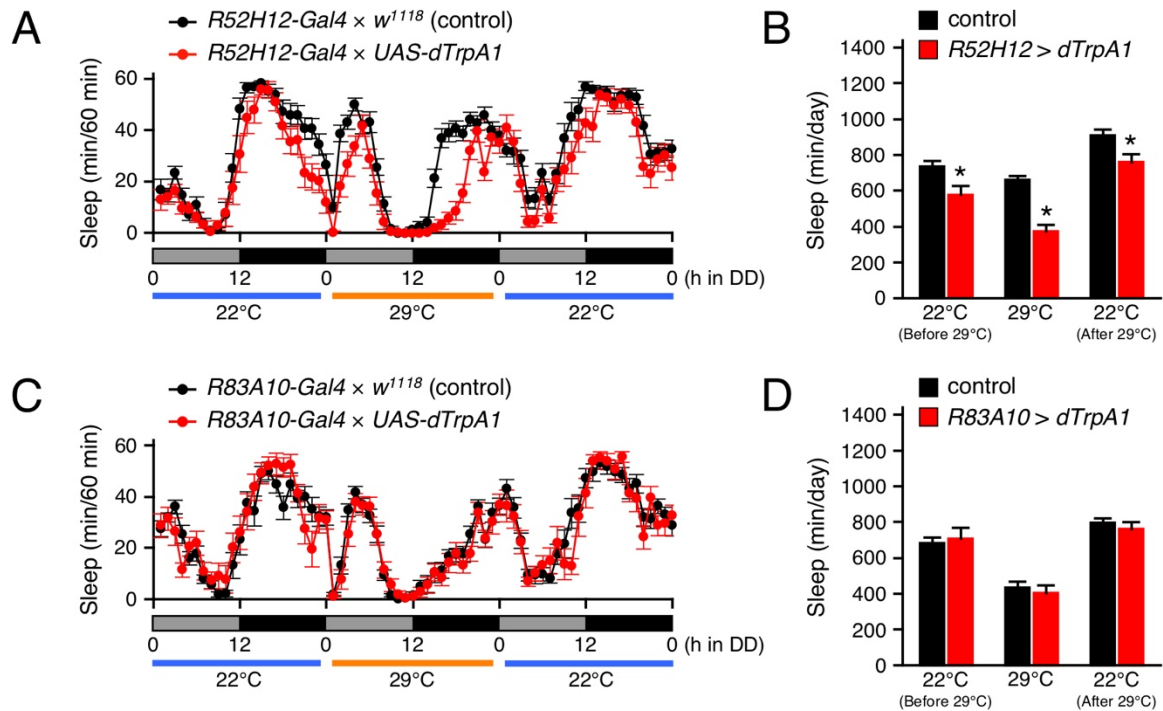

**Supplementary Figure 3.** Neuronal activation using *Gal4* drivers that express in the AVLP did not remarkably decrease sleep. **(A,B)** Sleep profiles for 60-min intervals **(A)** or total daily sleep **(B)** for controls (*R52H12-Gal4* × *w<sup>1118</sup>*, black circles or bars,  $n = 16$ ) or flies expressing *dTrpA1* with *R52H12-Gal4* (*R52H12-Gal4* × *UAS-dTrpA1*, red circles or bars,  $n = 14$ ) in DD. The behavior was monitored as described in **Figure 2**. **(C,D)** Sleep profiles for 60-min intervals **(C)** or total daily sleep **(D)** for controls (*R83A10-Gal4* × *w<sup>1118</sup>*, black circles or bars,  $n = 16$ ) or flies expressing *dTrpA1* with *R83A10-Gal4* (*R83A10-Gal4* × *UAS-dTrpA1*, red circles or bars,  $n = 11$ ) in DD. Data are presented as mean ± SEM. \* $p < 0.05$  vs. control at the corresponding temperature conditions (two-way repeated measures ANOVA followed by an analysis of simple main effect).

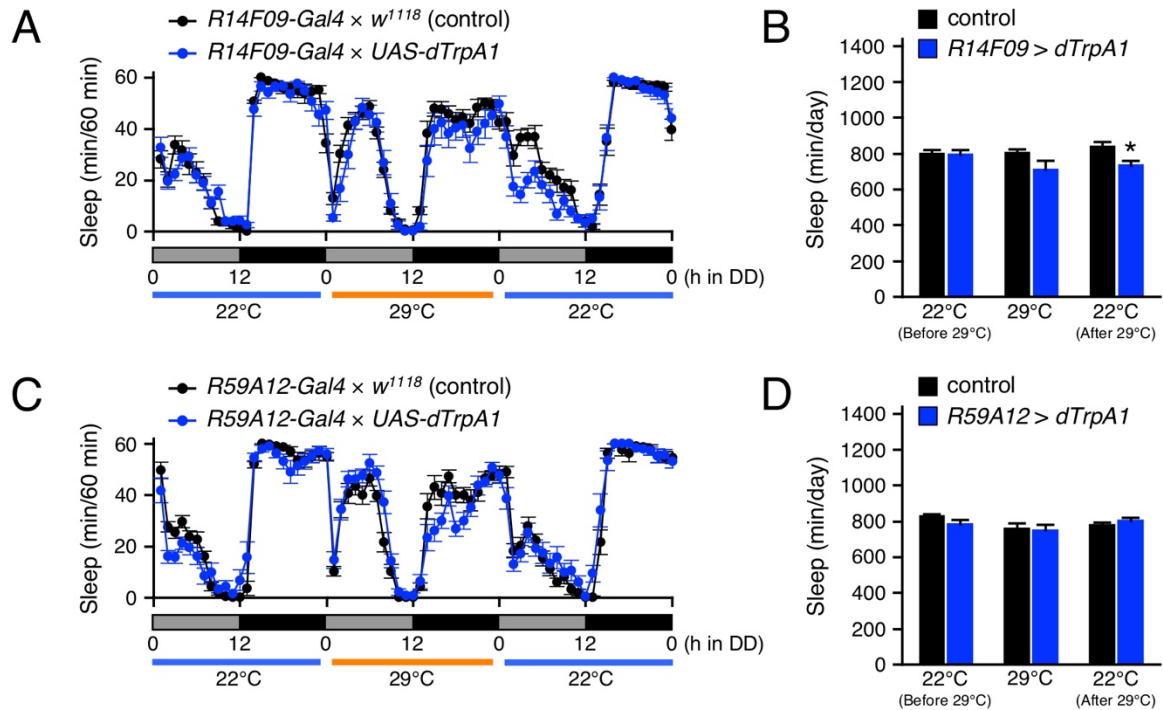

**Supplementary Figure 4.** Neuronal activation using *Gal4* drivers that express in the lobula plate cells did not increase sleep. **(A,B)** Sleep profiles for 60-min intervals **(A)** or total daily sleep **(B)** for controls (*R14F09-Gal4* × *w<sup>1118</sup>*, black circles or bars, *n* = 16) or flies expressing *dTrpA1* with *R14F09-Gal4* (*R14F09-Gal4* × *UAS-dTrpA1*, blue circles or bars, *n* = 16) in DD. The behavior was monitored as described in **Figure 2**. **(C,D)** Sleep profiles for 60-min intervals **(C)** or total daily sleep **(D)** for controls (*R59A12-Gal4* × *w<sup>1118</sup>*, black circles or bars, *n* = 15) or flies expressing *dTrpA1* with *R59A12-Gal4* (*R59A12-Gal4* × *UAS-dTrpA1*, blue circles or bars, *n* = 16) in DD. Data are presented as mean ± SEM. \**p* < 0.05 vs. control at the corresponding temperature conditions (two-way repeated measures ANOVA followed by an analysis of simple main effect).

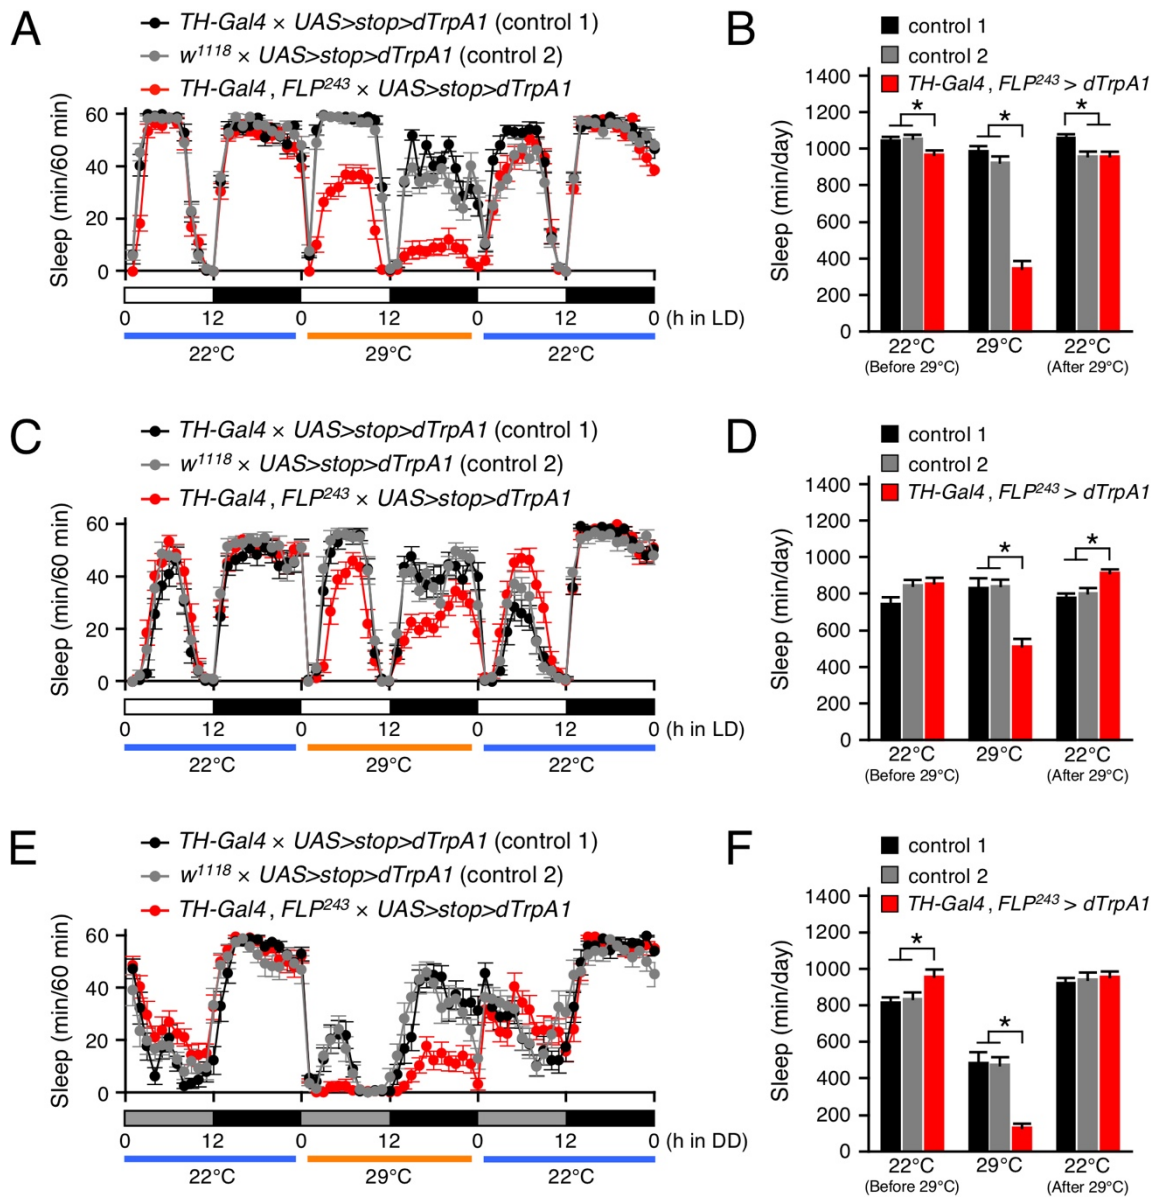

**Supplementary Figure 5.** Activation of T1 dopaminergic neurons in males under LD and in females under LD and DD decreased the amount of sleep. **(A,B)** Sleep profiles for 60-min intervals **(A)** or total daily sleep **(B)** for control male flies (*TH-Gal4* × *UAS>stop>dTrpA1*, black circles or bars; *w<sup>1118</sup>* × *UAS>stop>dTrpA1*, gray circles or bars) or experimental male flies (*TH-Gal4, FLP<sup>243</sup>* × *UAS>stop>dTrpA1*, red circles or bars) in LD conditions. **(C-F)** Sleep profiles for 60-min intervals **(C,E)** or total daily sleep **(D,F)** for controls or experimental female flies in LD **(C,D)** and DD **(E,F)** conditions. Data are presented as mean ± SEM (*n* = 16 flies per group). \**p* < 0.05; two-way repeated measures ANOVA followed by Holm multiple comparison test.

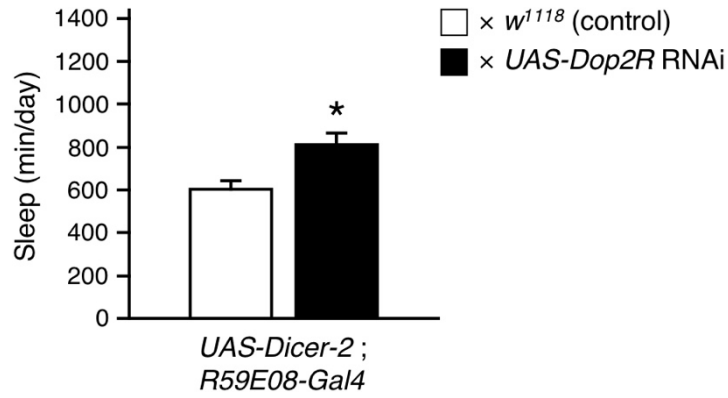

**Supplementary Figure 6.** *Dop2R* knockdown with *R59E08-Gal4* increased sleep. Total daily sleep for control (*UAS-Dicer-2*; *R59E08-Gal4* × *w<sup>1118</sup>*, white bar,  $n = 13$ ) and *Dop2R* RNAi (VDRC 1820)-expressing flies using the *R59E08-Gal4* driver (*UAS-Dicer-2*; *R59E08-Gal4* × *UAS-Dop2R* RNAi, black bars,  $n = 13$ ) in DD conditions. Data are averaged across 3 days and are presented as mean ± SEM. \* $p < 0.05$ ;  $t$ -test.

## 2 Supplementary Movies

**Supplementary Movie 1.** Confocal z-stack of the fly brain expressing *UAS-mCD8::GFP* under the control of *R52B10-Gal4*. Related to Figure 2G left panel.

**Supplementary Movie 2.** Confocal z-stack of the fly brain expressing *UAS-mCD8::GFP* under the control of *R59E08-Gal4*. Related to Figure 2H.

**Supplementary Movie 3.** Confocal z-stack of the brains of mosaic flies whose  $\Delta$ Sleep were  $> +2$  SD higher than the mean. Related to #1-7 in Figure 5B.

**Supplementary Movie 4.** Confocal z-stack of the brains of mosaic flies whose  $\Delta$ Sleep were nearly equal to the mean. Related to #1-7 in Figure 5C.

**Supplementary Movie 5.** Confocal z-stack of the fly brain expressing *UAS-DenMark* and *UAS-syt-GFP* under the control of *R52B10-Gal4*. Related to Figure 6A.

**Supplementary Movie 6.** Confocal z-stack of the fly brain expressing *pre-t-GRASP* with *R59E08-Gal4* and *post-t-GRASP* with *R52B10-LexA*. Related to Figure 6B.

**Supplementary Movie 7.** Confocal z-stack of the brain of *TH-Gal4, FLP<sup>243</sup>* crossed to *UAS>stop>mCD8::GFP* flies. Related to Figure 7A.

**Supplementary Movie 8.** Confocal z-stack of the fly brain expressing *CD4-spGFP1-10* with *TH-Gal4* and *CD4-spGFP11* with *R59E08-LexA*. Related to Figure 7D.

**Supplementary Movie 9.** Confocal z-stack of the fly brain expressing *CD4-spGFP1-10* with *TH-Gal4* and *CD4-spGFP11* with *R52B10-LexA*. Related to Figure 7E.
